# Supplementary material for: Liquid biopsy-based monitoring of residual disease in multiple myeloma by analysis of the rearranged immunoglobulin genes–A feasibility study
Source: PLoS One. 2023 May 26;18(5):e0285696. doi: 10.1371/journal.pone.0285696 (PMC10218758; doi:10.1371/journal.pone.0285696)
Supplement: S1 Table — (XLSX) [file pone.0285696.s004.xlsx]

## Sheet: AllClinicalData
Patient code	Age at diagnosis (years)	Sex	Monitoring timepoint	Sampling Date (dd/mm/yyyy)	Disease status	Therapy	M-protein isotype	M-protein (g/L)	FLC (mg/L)	Notes
MM-1	77	Female	0/D	2012-04-01	sMM		IgA κ	4	-	-
			0**	2018-04-10	Incipient relapse	Lenalidomide therapy starts		2.8	107	Small tumor burden
			1	2018-11-13	Clinical remission: MR			1.8	-	-
			2	2019-03-13	Incipient relapse			3.2	138	-
			3	2021-06-08	Smouldering disease			2.6	60.9	-
MM-2	48	Male	0/D	2018-06-29	Newly diagnosed		IgG λ	65.7	87.3	-
			1	2019-03-12	CR	VTD therapy (8 cycles)		0	10.3	Immunofix negative
			2	2019-07-04	CR	After ASCT, lenalidomide support therapy starts		0	-	Immunofix negative, 0.002% normal PC in BM
			3	2019-11-21	CR	Lenalidomide support therapy		0	-	Immunofix negative, only normal PC in BM
			4	14.01.2021.	CR	Lenalidomide support therapy ends		0	-	Immunofix negative, only normal PC in BM
			5	30.03.2022.	Sustained CR			0	-	Immunofix negative
MM-3	49	Female	0/D	2019-01-10	Newly diagnosed		IgA κ	79.6	4680	-
			1	2019-10-14		After VTD therapy and ASCT, lenalidomide support therapy starts		0	5.64	Immunofix negative, only normal PC in BM
MM-4	63	Male	0/D	2019-02-06	Newly diagnosed		IgG κ	36	142	-
			1	2019-11-05		After VTD therapy (6 cycles)		2.3	28.2	-
			2	2020-12-04		After ASCT, lenalidomide intolerant		4.3	35.2	-
			3	2021-01-05	Incipient relapse			6.4	-	-
			4	2021-02-09	Incipient relapse			8.2	37.3	-
			5	2021-03-09	Confirmed relapse			11.8	-	-
			6	2021-04-20		VRD salvage therapy starts		13.7	38.1	-
MM-5	70	Female	0/D	2019-04-02	Newly diagnosed	MPV therapy starts	IgG κ	61.8	-	-
			1	2019-10-01		MPV therapy		31.7	-	-
			2	2020-05-19		Bortezomib monotherapy		30	-	-
			3	2020-06-05		Bortezomib monotherapy		30	-	-
			4	2020-08-04	Definite biochemic progress	Bortezomib monotherapy		49.2	-	-
			5	2020-09-15	Clinical relapse	Bortezomib monotherapy		56.2	-	Change in therapy later
MM-6	54	Female	0/D	2019-04-02	Newly diagnosed	VTD therapy starts	IgG κ	37.6	9220	-
			1	2019-11-06	vgPR			3.8	373	-
			2	2020-06-12	Relapse	ASCT, DVd therapy		14	752	-
			3	2020-08-25		Carfilzomib-dexamethasone combination therapy		21.8	3590	Change in therapy due to therapy refractivity
			4	2020-10-06	-			30.2	5210	Therapy refractivity
MM-7	64	Female	0/D	2019-04-05	Newly diagnosed		IgA λ	23.3	95.8	-
			1	2019-10-08		VTD therapy		0	9.8	Immunofix negative
			2	2020-01-07		Before ASCT		0	-	Immunofix negative
			3	2021-01-15	Biochemic / incipient relapse			9.6	39.7	-
			4	2021-03-12	Symptomatic relapse			-	-	Problems with the sample, the patient passed before the repeated sampling
MM-8	43	Male	0/D	2017-09-19	Newly diagnosed		IgG κ	51.3	143	-
			1	2019-10-15	Incipient relapse	VTD therapy, ASCT, lenalidomide support therapy		3.4	16.9	-
			2	2021-01-15		Lenalidomide support therapy ends		8.6	21	-
			3	2021-03-26	SD			8.6	20.4	-
			4	2021-04-30	SD			8	-	Relapse in July 2021
MM-241*	76	Female	0/D	2019-05-07	Newly diagnosed		IgA κ	-	-	-
MM-249*	No data	Male	0/D	2019-05-20	Newly diagnosed		IgA κ	-	-	-
MM-290*	58	Female	0/D	2013-05-29	Newly diagnosed		IgG λ	-	-	-
			1	2019-10-01	PD (extramedullary)			-	-	-

## Sheet: Abbreviations
0/D:	time of diagnosis
FLC:	free light chain
PC:	plasma cell
BM:	bone marrow
sMM:	smouldering multiple myeloma
MR:	minimal response
CR:	complete response
vgPR:	very good partial response
PD:	progressive disease
SD:	stable disease
VTD:	Bortezomib-Thalidomide-Dexamethasone combination therapy
VRD:	Bortezomib-Lenalidomide-Dexamethasone combination therapy
MPV:	Melphalan-Bortezomib-Prednisone combination therapy
DVd:	Daratumumab-Bortezomib-Dexamethasone combination therapy
Notes:
*patients excluded from analyses
** Samples from this timepoint were analyzed by the not yet optimized NGS system, thus we omitted these data from further analysis. This timepoint in only shown for illustrating this patient's clinical history.
